# Supplementary material
Source: PubMed Central journal article supplement (PMC4108286)
Supplement: NIHMS159158-supplement-1.pdf [file NIHMS159158-supplement-1.pdf]

## **Supplementary Data**

**Figure S 1.** TSAb specific for the human-TSHR and the mouse-TSHR in parental strains of BXH mice (C3H and B6). Sera were tested one month week after three immunizations (3x) with A sub-Ad.

A) Human-TSHR -TSAb; \*  $p=0.026$ , (Rank Sum test).

B) Mouse -TSHR TSAb; \*\*  $p=0.006$  (Rank sum test);

C) Ratio of mouse to human-TSHR TSAb

TSAb data (mean + SEM) are the responses expressed as a percentage for sera from mice immunized with control adenovirus (indicated by dashed lines in A to D). Number of mice studied: C3H and B6,  $n=10$ .

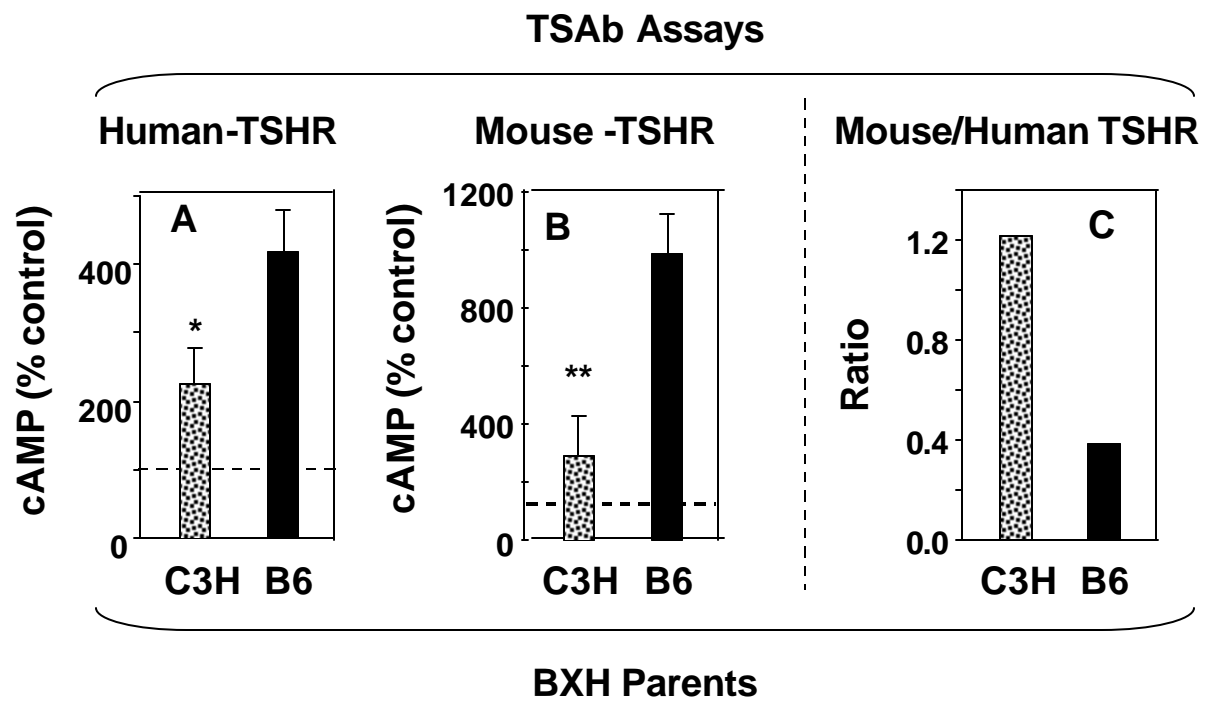

**Figure S1**

**Supplementary Table S1.** Chr linkage for TSAb in **CXB** and **BXH** mice immunized three times with TSHR A-subunit adenovirus. TSAb activity was measured with mouse (m)-TSHR cells and human (h)-TSHR cells; from these data, the TSAb ratio (human: mouse, h:m or mouse: human, m:h) was calculated. Loci and chromosomal locations (megabases, Mb) are presented for LRS scores suggestive of linkage. Possible candidate genes are included with the corresponding (or likely) human chromosome in parentheses. Genenetwork identifiers (GN) are included.

| Strain                          | LRS           | Chr       | Locus                                               | Mb                                       | Candidate          | Hu         |
|---------------------------------|---------------|-----------|-----------------------------------------------------|------------------------------------------|--------------------|------------|
| <b>human-TSAb</b>               |               |           |                                                     |                                          |                    |            |
| <b>BXH (3x)<sup>a</sup></b>     | <b>19.884</b> | <b>9</b>  | rs13480317<br>rs6224819                             | 85.581<br>96.718                         |                    | (6)<br>(3) |
|                                 | <b>18.642</b> | <b>12</b> | rs13459138<br>rs3705923<br>rs3692361<br>rs3679276   | 113.270<br>117.869<br>118.161<br>120.329 | Igh V region genes | 14         |
| <b>CXB (3x)<sup>b</sup></b>     | <b>14.323</b> | <b>17</b> | gnf17.035.152<br>rs6395893<br>D17Mit66<br>rs3690039 | 34.663<br>38.786<br>47.186<br>48.900     | MHC region genes   | 6          |
|                                 | <b>14.323</b> | <b>X</b>  | rs13483834<br>rs13483877                            | 72.576<br>83.201                         | Il1rapl1           | X          |
| <b>mouse-TSAb</b>               |               |           |                                                     |                                          |                    |            |
| <b>BXH (3x)<sup>c</sup></b>     | <b>14.388</b> | <b>9</b>  | gnf09.094.244<br>rs13480367                         | 97.499<br>98.732                         |                    | (3)        |
|                                 | <b>14.388</b> | <b>13</b> | rs13481870<br>rs13481871<br>rs3669221               | 71.470<br>71.761<br>84.210               |                    | (5)        |
| <b>CXB (3x)<sup>d</sup></b>     | <b>13.832</b> | <b>10</b> | rs13480631<br>D10Mit223                             | 67.396<br>67.608                         |                    |            |
| <b>TSAb Ratio</b>               |               |           |                                                     |                                          |                    |            |
| <b>BXH m:h (3x)<sup>e</sup></b> | <b>18.323</b> | <b>12</b> | rs13459138<br>rs3705923<br>rs3692361<br>rs3679276   | 113.271<br>117.869<br>118.161<br>120.329 | Igh V region genes | 14         |
|                                 | <b>16.343</b> |           |                                                     |                                          |                    | 14         |
| <b>CXB h:m (3x)</b>             | <b>17.927</b> | <b>4</b>  | rs13477645<br>rs13477662                            | 35.751<br>39.980                         |                    | (9)        |

<sup>a</sup> From McLachlan SM *et al. Endocrinol.* 2008;**149**: 2001-2009

<sup>b</sup> below LRS 14.5 cut-off for association

<sup>c</sup> excluding BXH9 (outlier)

<sup>d</sup>; without SEM

<sup>e</sup> similar observations for h:m TSAb (GN10160) but lower LRS values.

LRS = LOD X 4.6.

Candidates:MHC region: C2 (34.470663), Hspa1 (34.577246);Tnf (34.807461; Ltb (34.802573);  
Il1rapl1, interleukin 1 receptor; Igh V region genes, immunoglobulin heavy chain variable region genes.

GN identifiers (after 3 immunizations):- Human TSAb: BXH GN10148; CXB GN10684; Mouse TSAb  
BXH GN10156, CXB GN10688; TSAb Ratio: BXH m:h GN10158, CXB h:m GN 10689.

**Supplementary Table S2.** List of genes within the mouse Chr 12 locus linked to the preferential recognition by thyroid stimulating antibodies for the mouse- versus human-TSHR. Within this locus (113.595 - 118.161 Mb), 32 of 66 genes encode immunoglobulin H chain variable regions genes. The latter genes are highlighted in yellow to provide a visual impression; the amount of information on individual genes requires a type too small to be legible. Of the 34 non-highlighted genes, only 7 are identified (*Crip 1*, *Crip 2*, *Tmem 121*, *Adam6*, *Vipr*, *ptprn2* and *Rapgef5*).

|     | Marker/Gene                   | Mb start                   | Gene Length              | SNP                  | SNP/Kb            | Mb start                 |                               |
|-----|-------------------------------|----------------------------|--------------------------|----------------------|-------------------|--------------------------|-------------------------------|
| 897 | <a href="#">Crip2</a>         | <a href="#">113.588354</a> | <a href="#">4.958</a>    | <a href="#">1</a>    | 0.201694          | <a href="#">105.0122</a> | cysteine rich protein 2       |
| 898 | <a href="#">9230109C02Rik</a> | <a href="#">113.598197</a> | <a href="#">0.969</a>    | <a href="#">5</a>    | 5.159959          |                          | RIKEN cDNA 9230109C02 gene    |
| 899 | <a href="#">Crip1</a>         | <a href="#">113.599819</a> | <a href="#">1.868</a>    | <a href="#">5</a>    | 2.67666           | <a href="#">105.0237</a> | cysteine-rich protein 1 (i... |
| 900 | <a href="#">4930427A07Rik</a> | <a href="#">113.604228</a> | <a href="#">9.038</a>    | <a href="#">69</a>   | 7.634432          |                          | RIKEN cDNA 4930427A07 gene    |
| 901 | <a href="#">Tmem121</a>       | <a href="#">113.63371</a>  | <a href="#">3.62</a>     | <a href="#">4</a>    | 1.104972          |                          | transmembrane protein 121     |
| 902 | <a href="#">Igh-2</a>         | <a href="#">113.702706</a> | <a href="#">1596.779</a> | <a href="#">2047</a> | 1.281956          |                          | immunoglobulin heavy chain... |
| 903 | <a href="#">LOC677563</a>     | <a href="#">113.706524</a> | <a href="#">1388.292</a> | <a href="#">1724</a> | 1.241814          |                          | similar to Ig heavy chain ... |
| 904 | <a href="#">Igh-VJ558</a>     | <a href="#">113.707998</a> | <a href="#">4.927</a>    | <a href="#">0</a>    | <a href="#">0</a> |                          | immunoglobulin heavy chain... |
| 905 | <a href="#">Gm900</a>         | <a href="#">113.719922</a> | <a href="#">0.32</a>     | <a href="#">0</a>    | <a href="#">0</a> |                          | gene model 900, (NCBI)        |
| 906 | <a href="#">Igh-VX24</a>      | <a href="#">113.720994</a> | <a href="#">315.352</a>  | <a href="#">370</a>  | 1.173292          |                          | immunoglobulin heavy chain... |
| 907 | <a href="#">Igh-1a</a>        | <a href="#">113.73546</a>  | <a href="#">0.05</a>     | <a href="#">0</a>    | <a href="#">0</a> |                          | immunoglobulin heavy chain... |
| 908 | <a href="#">Ighg</a>          | <a href="#">113.754412</a> | <a href="#">0.05</a>     | <a href="#">0</a>    | <a href="#">0</a> |                          | Immunoglobulin heavy chain... |
| 909 | <a href="#">Igh-V3609N</a>    | <a href="#">113.777676</a> | <a href="#">1028.171</a> | <a href="#">1120</a> | 1.089313          |                          | immunoglobulin heavy chain... |
| 910 | <a href="#">AI324046</a>      | <a href="#">113.807417</a> | <a href="#">0.05</a>     | <a href="#">1</a>    | 20                |                          | expressed sequence AI32404... |
| 911 | <a href="#">Ighv14-2</a>      | <a href="#">113.854416</a> | <a href="#">23.855</a>   | <a href="#">4</a>    | 0.16768           |                          | immunoglobulin heavy varia... |
| 912 | <a href="#">LOC630279</a>     | <a href="#">113.876323</a> | <a href="#">431.092</a>  | <a href="#">408</a>  | 0.946434          |                          | similar to Ig heavy chain ... |
| 913 | <a href="#">EG633457</a>      | <a href="#">113.876323</a> | <a href="#">0.053</a>    | <a href="#">0</a>    | <a href="#">0</a> |                          | predicted gene, EG633457      |
| 914 | <a href="#">Ighv5-9</a>       | <a href="#">113.876892</a> | <a href="#">233.209</a>  | <a href="#">75</a>   | 0.3216            |                          | immunoglobulin heavy varia... |
| 915 | <a href="#">Igh-V3660</a>     | <a href="#">113.876894</a> | <a href="#">605.008</a>  | <a href="#">494</a>  | 0.816518          |                          | immunoglobulin heavy chain... |
| 916 | <a href="#">LOC380804</a>     | <a href="#">113.877277</a> | <a href="#">196.308</a>  | <a href="#">66</a>   | 0.336206          |                          | Ig heavy chain V region       |
| 917 | <a href="#">Ighv7-3</a>       | <a href="#">113.877277</a> | <a href="#">724.175</a>  | <a href="#">689</a>  | 0.951427          |                          | immunoglobulin heavy varia... |
| 918 | <a href="#">4930523C11Rik</a> | <a href="#">113.937318</a> | <a href="#">2.162</a>    | <a href="#">3</a>    | 1.387604          |                          | RIKEN cDNA 4930523C11 gene    |
| 919 | <a href="#">Adam6</a>         | <a href="#">113.991715</a> | <a href="#">2.507</a>    | <a href="#">0</a>    | <a href="#">0</a> |                          | a disintegrin and metallo...  |
| 920 | <a href="#">Igh-V7183</a>     | <a href="#">114.183919</a> | <a href="#">0.281</a>    | <a href="#">2</a>    | 7.117438          |                          | immunoglobulin heavy chain... |
| 921 | <a href="#">Igh-V10</a>       | <a href="#">114.18419</a>  | <a href="#">0.157</a>    | <a href="#">2</a>    | 12.73885          |                          | immunoglobulin heavy chain... |
| 922 | <a href="#">LOC382653</a>     | <a href="#">114.274454</a> | <a href="#">0.295</a>    | <a href="#">1</a>    | 3.389831          |                          | immunoglobulin heavy chain... |
| 923 | <a href="#">Igh-V11</a>       | <a href="#">114.496047</a> | <a href="#">0.465</a>    | <a href="#">6</a>    | 12.90323          |                          | immunoglobulin heavy chain... |
| 924 | <a href="#">Ighv14-3</a>      | <a href="#">114.507652</a> | <a href="#">0.294</a>    | <a href="#">1</a>    | 3.401361          |                          | immunoglobulin heavy varia... |
| 925 | <a href="#">LOC544905</a>     | <a href="#">114.588499</a> | <a href="#">0.294</a>    | <a href="#">4</a>    | 13.60544          |                          | Ig heavy chain V region       |
| 926 | <a href="#">Igh-VS107</a>     | <a href="#">114.600988</a> | <a href="#">0.303</a>    | <a href="#">2</a>    | 6.60066           |                          | immunoglobulin heavy chain... |

|     |                                 |                            |                         |                     |          |                          |                               |
|-----|---------------------------------|----------------------------|-------------------------|---------------------|----------|--------------------------|-------------------------------|
| 927 | <a href="#">Ighv7-4</a>         | <a href="#">114.670605</a> | <a href="#">0.53</a>    | <a href="#">2</a>   | 3.773585 |                          | immunoglobulin heavy varia... |
| 928 | <a href="#">LOC432699</a>       | <a href="#">114.735961</a> | <a href="#">0.294</a>   | 0                   | 0        |                          | VH gene product               |
| 929 | <a href="#">EG636260</a>        | <a href="#">114.747769</a> | <a href="#">0.428</a>   | <a href="#">2</a>   | 4.672897 |                          | predicted gene, EG636260      |
| 930 | <a href="#">EG633674</a>        | <a href="#">114.770182</a> | <a href="#">0.292</a>   | 0                   | 0        |                          | predicted gene, EG633674      |
| 931 | <a href="#">Ighv6-6</a>         | <a href="#">114.839518</a> | <a href="#">64.374</a>  | <a href="#">86</a>  | 1.335943 |                          | immunoglobulin heavy varia... |
| 932 | <a href="#">EG380809</a>        | <a href="#">114.97125</a>  | <a href="#">0.445</a>   | <a href="#">3</a>   | 6.741573 |                          | predicted gene, EG380809      |
| 933 | <a href="#">Igh-V15</a>         | <a href="#">115.012385</a> | <a href="#">0.311</a>   | 0                   | 0        |                          | immunoglobulin heavy chain... |
| 934 | <a href="#">EG629860</a>        | <a href="#">115.063657</a> | <a href="#">0.469</a>   | <a href="#">1</a>   | 2.132196 |                          | predicted gene, EG629860      |
| 935 | <a href="#">Igh</a>             | <a href="#">115.094379</a> | <a href="#">0.267</a>   | 0                   | 0        |                          | immunoglobulin heavy chain... |
| 936 | <a href="#">Ighv1-26</a>        | <a href="#">115.236181</a> | <a href="#">0.292</a>   | 0                   | 0        |                          | immunoglobulin heavy varia... |
| 937 | <a href="#">Ighv1-47</a>        | <a href="#">115.438915</a> | <a href="#">0.473</a>   | <a href="#">2</a>   | 4.22833  |                          | immunoglobulin heavy varia... |
| 938 | <a href="#">LOC382693</a>       | <a href="#">115.567556</a> | <a href="#">0.293</a>   | 0                   | 0        |                          | similar to immunoglobulin ... |
| 939 | <a href="#">AB069917</a>        | <a href="#">115.606209</a> | <a href="#">0.295</a>   | <a href="#">1</a>   | 3.389831 |                          | cDNA sequence AB069917        |
| 940 | <a href="#">EG211331</a>        | <a href="#">115.641482</a> | <a href="#">0.434</a>   | 0                   | 0        |                          | predicted gene, EG211331      |
| 941 | <a href="#">V165-D-J-C mu</a>   | <a href="#">115.655906</a> | <a href="#">0.29</a>    | <a href="#">1</a>   | 3.448276 |                          | IgM variable region           |
| 942 | <a href="#">Ighv1-61</a>        | <a href="#">115.806946</a> | <a href="#">0.295</a>   | 0                   | 0        |                          | immunoglobulin heavy varia... |
| 943 | <a href="#">Ighv1-72</a>        | <a href="#">116.20579</a>  | <a href="#">0.434</a>   | <a href="#">1</a>   | 2.304147 |                          | immunoglobulin heavy varia... |
| 944 | <a href="#">Igh-6</a>           | <a href="#">116.205791</a> | <a href="#">0.294</a>   | 0                   | 0        |                          | immunoglobulin heavy chain... |
| 945 | <a href="#">Ighv1-77</a>        | <a href="#">116.309674</a> | <a href="#">0.434</a>   | 0                   | 0        |                          | immunoglobulin heavy varia... |
| 946 | <a href="#">EG434609</a>        | <a href="#">116.428509</a> | <a href="#">0.433</a>   | 0                   | 0        |                          | predicted gene, EG434609      |
| 947 | <a href="#">Zfp386</a>          | <a href="#">116.495531</a> | <a href="#">12.869</a>  | <a href="#">5</a>   | 0.388531 |                          | zinc finger protein 386 (K... |
| 948 | <a href="#">Vipr2</a>           | <a href="#">116.519808</a> | <a href="#">67.576</a>  | <a href="#">203</a> | 3.004025 | <a href="#">158.3203</a> | vasoactive intestinal pept... |
| 949 | <a href="#">Wdr60</a>           | <a href="#">116.649065</a> | <a href="#">55.969</a>  | <a href="#">192</a> | 3.43047  | <a href="#">158.1487</a> | WD repeat domain 60           |
| 950 | <a href="#">LOC100042963</a>    | <a href="#">116.722406</a> | <a href="#">0.591</a>   | 0                   | 0        |                          | hypothetical protein LOC10... |
| 951 | <a href="#">D12Ertd551e</a>     | <a href="#">116.72323</a>  | <a href="#">91.875</a>  | <a href="#">272</a> | 2.960544 |                          | DNA segment, Chr 12, ERATO... |
| 952 | <a href="#">2310058N22Rik</a>   | <a href="#">116.82261</a>  | <a href="#">0.05</a>    | 0                   | 0        |                          | RIKEN cDNA 2310058N22 gene    |
| 953 | <a href="#">D430020J02Rik</a>   | <a href="#">116.843955</a> | <a href="#">3.189</a>   | 0                   | 0        |                          | RIKEN cDNA D430020J02 gene    |
| 954 | <a href="#">Ncapg2</a>          | <a href="#">116.84741</a>  | <a href="#">58.129</a>  | <a href="#">215</a> | 3.69867  |                          | non-SMC condensin II compl... |
| 955 | <a href="#">Ptprn2</a>          | <a href="#">116.927841</a> | <a href="#">790.961</a> | <a href="#">873</a> | 1.103721 | <a href="#">156.8312</a> | protein tyrosine phosphata... |
| 956 | <a href="#">5730406E14Rik</a>   | <a href="#">117.473439</a> | <a href="#">1.557</a>   | 0                   | 0        |                          | RIKEN cDNA 5730406E14 gene    |
| 957 | <a href="#">ENSMUSG00000072</a> | <a href="#">117.586538</a> | <a href="#">6.686</a>   | <a href="#">1</a>   | 0.149566 |                          | predicted gene, ENSMUSG000... |
| 958 | <a href="#">LOC432713</a>       | <a href="#">117.724601</a> | <a href="#">54.43</a>   | <a href="#">50</a>  | 0.918611 |                          | hypothetical gene supporte... |
| 959 | <a href="#">Rapgef5</a>         | <a href="#">117.958487</a> | <a href="#">240.167</a> | <a href="#">148</a> | 0.616238 | <a href="#">21.93116</a> | Rap guanine nucleotide exc... |
| 960 | <a href="#">2900082C11Rik</a>   | <a href="#">117.973837</a> | <a href="#">0.465</a>   | 0                   | 0        |                          | RIKEN cDNA 2900082C11 gene    |

|     |                                                                                                                 |                            |                         |                     |          |                          |                               |
|-----|-----------------------------------------------------------------------------------------------------------------|----------------------------|-------------------------|---------------------|----------|--------------------------|-------------------------------|
| 961 |  <a href="#">A930023M06Rik</a> | <a href="#">118.044047</a> | <a href="#">1.723</a>   | 0                   | 0        |                          | RIKEN cDNA A930023M06 gene    |
| 962 |  <a href="#">D830016K09Rik</a> | <a href="#">118.072022</a> | <a href="#">3.767</a>   | 0                   | 0        |                          | RIKEN cDNA D830016K09 gene    |
| 963 |  <a href="#">Cdca7l</a>        | <a href="#">118.285869</a> | <a href="#">36.942</a>  | <a href="#">16</a>  | 0.433111 |                          | cell division cycle associ... |
| 964 |  <a href="#">Dnahc11</a>       | <a href="#">118.322087</a> | <a href="#">321.058</a> | <a href="#">341</a> | 1.062113 |                          | dynein, axonemal, heavy ch... |
| 965 |  <a href="#">Sp4</a>           | <a href="#">118.679034</a> | <a href="#">66.437</a>  | 0                   | 0        | <a href="#">21.24093</a> | trans-acting transcription... |
| 966 |  <a href="#">Sp8</a>           | <a href="#">119.291657</a> | <a href="#">5.021</a>   | 0                   | 0        | <a href="#">20.59514</a> | trans-acting transcription... |
| 967 |  <a href="#">Abcb5</a>         | <a href="#">119.380328</a> | <a href="#">30.195</a>  | <a href="#">1</a>   | 0.033118 | <a href="#">20.46028</a> | ATP-binding cassette, sub-... |
| 968 |  <a href="#">Itgb8</a>         | <a href="#">119.606904</a> | <a href="#">75.474</a>  | <a href="#">57</a>  | 0.755227 | <a href="#">20.14399</a> | integrin beta 8               |
| 969 |  <a href="#">8030462D06Rik</a> | <a href="#">119.609983</a> | <a href="#">0.873</a>   | 0                   | 0        |                          | RIKEN cDNA 8030462D06 gene    |
| 970 |  <a href="#">4732474O15Rik</a> | <a href="#">119.910833</a> | <a href="#">0.05</a>    | 0                   | 0        |                          | RIKEN cDNA 4732474O15 gene    |
| 971 |  <a href="#">Tmem196</a>       | <a href="#">120.389923</a> | <a href="#">1.607</a>   | 0                   | 0        |                          | transmembrane                 |
